# Supplementary material
Source: PubMed Central journal article supplement (PMC6403018)
Supplement: NIHMS1518327-supplement-125_2018_4802_MOESM1_ESM.pdf [file NIHMS1518327-supplement-125_2018_4802_MOESM1_ESM.pdf]

## ESM Figure 1:

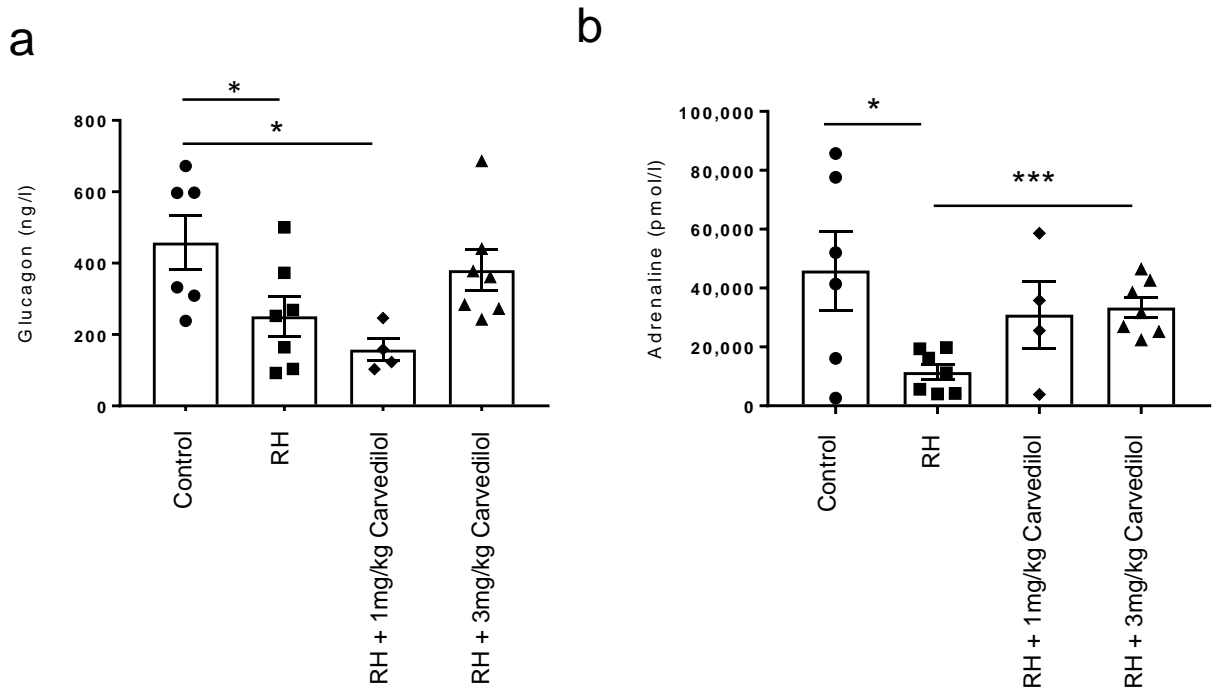

**ESM Figure 1: Carvedilol dose response study.** Plasma glucagon (a) and adrenaline (b) responses of RH animals treated with either 1mg/kg ( $n=4$ ) or 3mg/kg of carvedilol ( $n=7$ ) compared to saline controls ( $n=6$ ) and RH animals ( $n=7$ ). Plasma glucagon responses were significantly lower in the RH and RH+1mg/kg carvedilol groups compared to controls ( $*p<0.05$  vs Control). Plasma adrenaline responses were significantly suppressed in RH animals ( $*p<0.05$  vs Control) and treatment with 3mg/kg of carvedilol restored these responses to normal ( $***p<0.001$  vs RH;  $p=NS$  vs Control), whereas treatment with 1mg/kg carvedilol saw no significant improvement ( $p=0.06$  vs. RH). Data were analysed using one-way ANOVA with Tukey HSD and are presented as mean  $\pm$  SEM.
